# Supplementary material for: Sustainable Preparation of Nanoporous Carbons via Dry Ball Milling: Electrochemical Studies Using Nanocarbon Composite Electrodes and a Deep Eutectic Solvent as Electrolyte
Source: MDPI journal article supplement (doi:10.3390/nano11123258), 2021-11-30
Supplement: s1 [file s1]

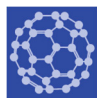

# Supporting Information File

## Sustainable Preparation of Nanoporous Carbons via Dry Ball Milling: Electrochemical Studies Using Nanocarbon Composite Electrodes and a Deep Eutectic Solvent as Electrolyte

Ana T. S. C. Brandão, Renata Costa, A. Fernando Silva and Carlos M. Pereira \*

Departamento de Química e Bioquímica, Faculdade de Ciências da Universidade do Porto,  
CIQUP–Physical Analytical Chemistry and Electrochemistry Group, Rua do Campo Alegre,  
s/n, 4169–007 Porto, Portugal; up200706627@edu.fc.up.pt (A.T.S.C.B.); renata.costa@fc.up.pt (R.C.);  
afssilva@fc.up.pt (A.F.S.)

\* Correspondence: cmpereir@fc.up.pt

### Morphological studies: SEM analysis

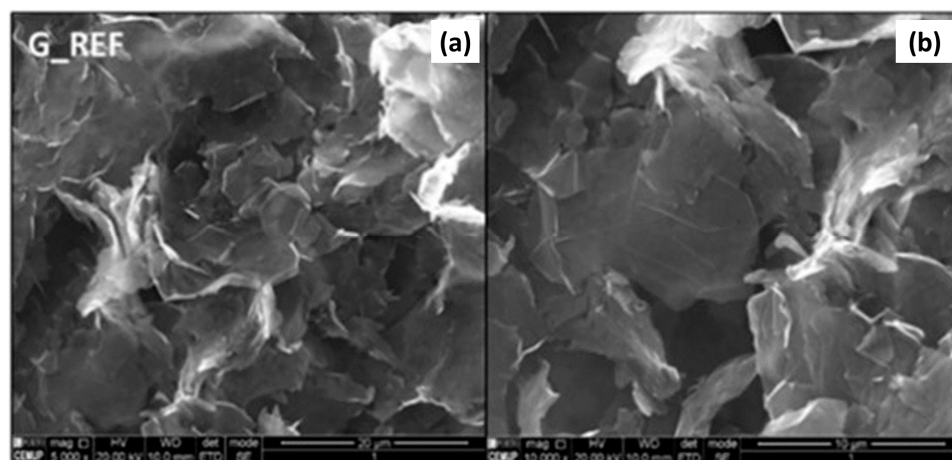

(A)

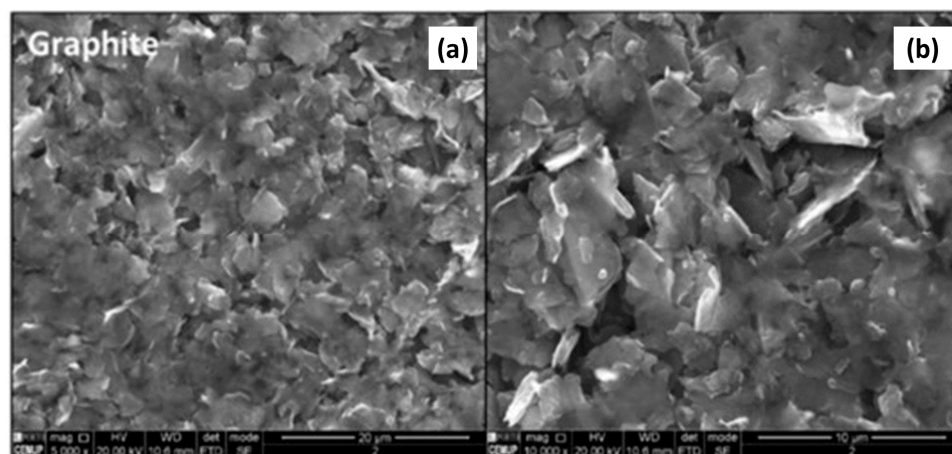

(B)

**Figure S1.** Electron microscopy images showing the structure of G\_REF (A) and commercial graphite (B) samples with 5000× (a), 10000× (b) magnification.

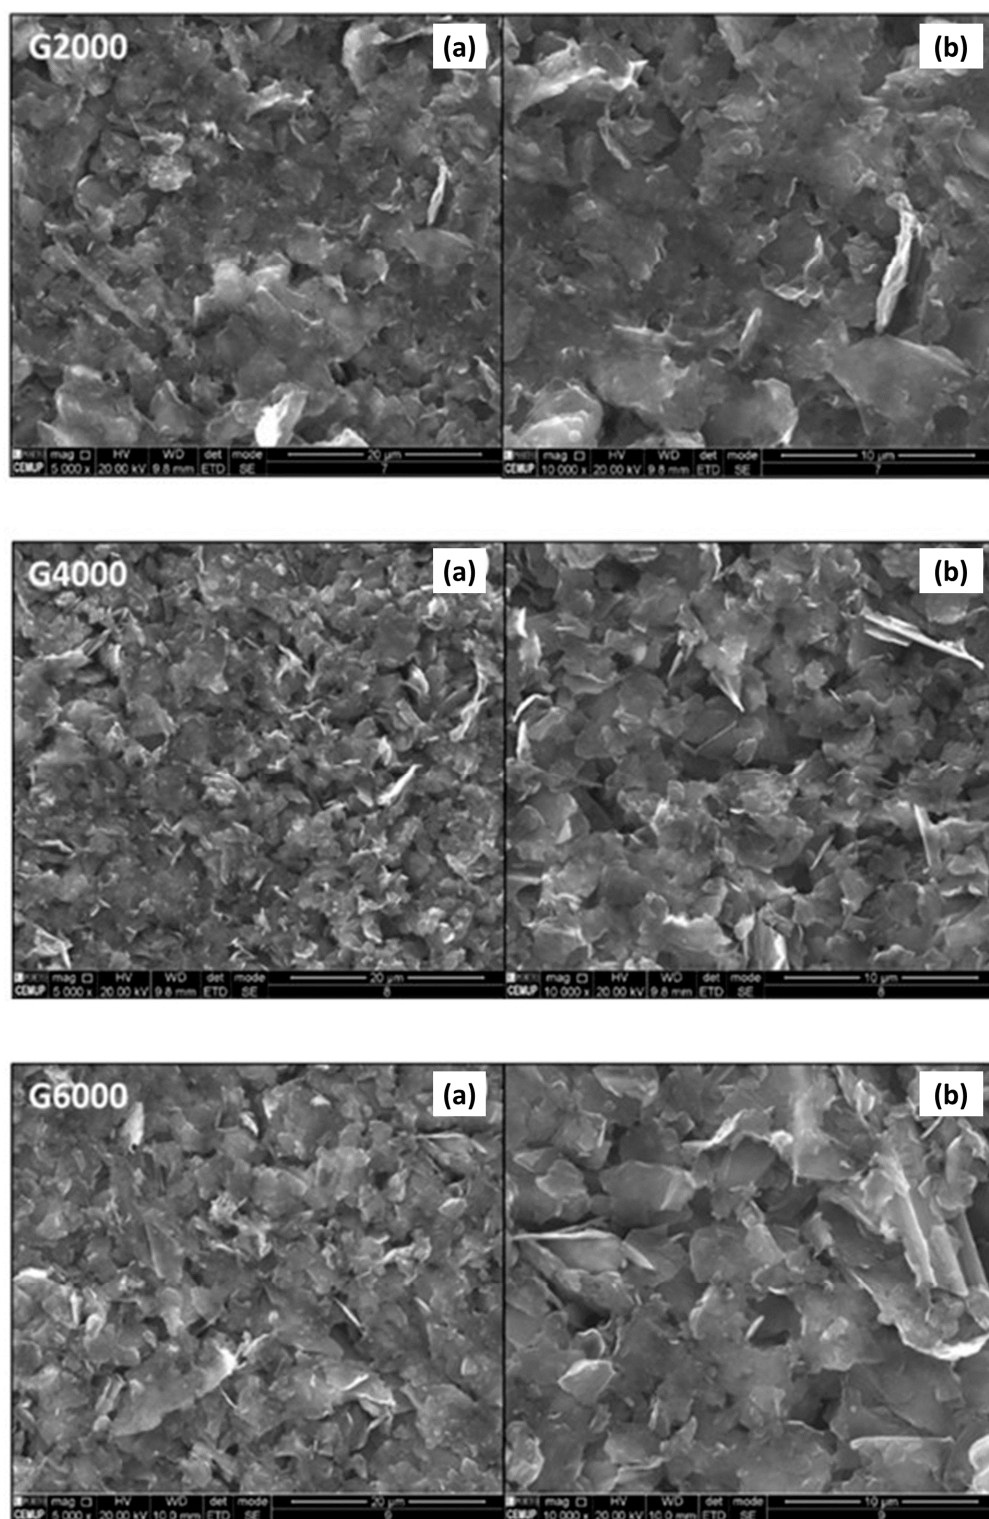

**Figure S2.** Electron microscopy images showing the structure of G@2000, G@4000 and G@6000 sample with 5000 $\times$  (a), 10000 $\times$  (b) magnification.

## AFM analysis

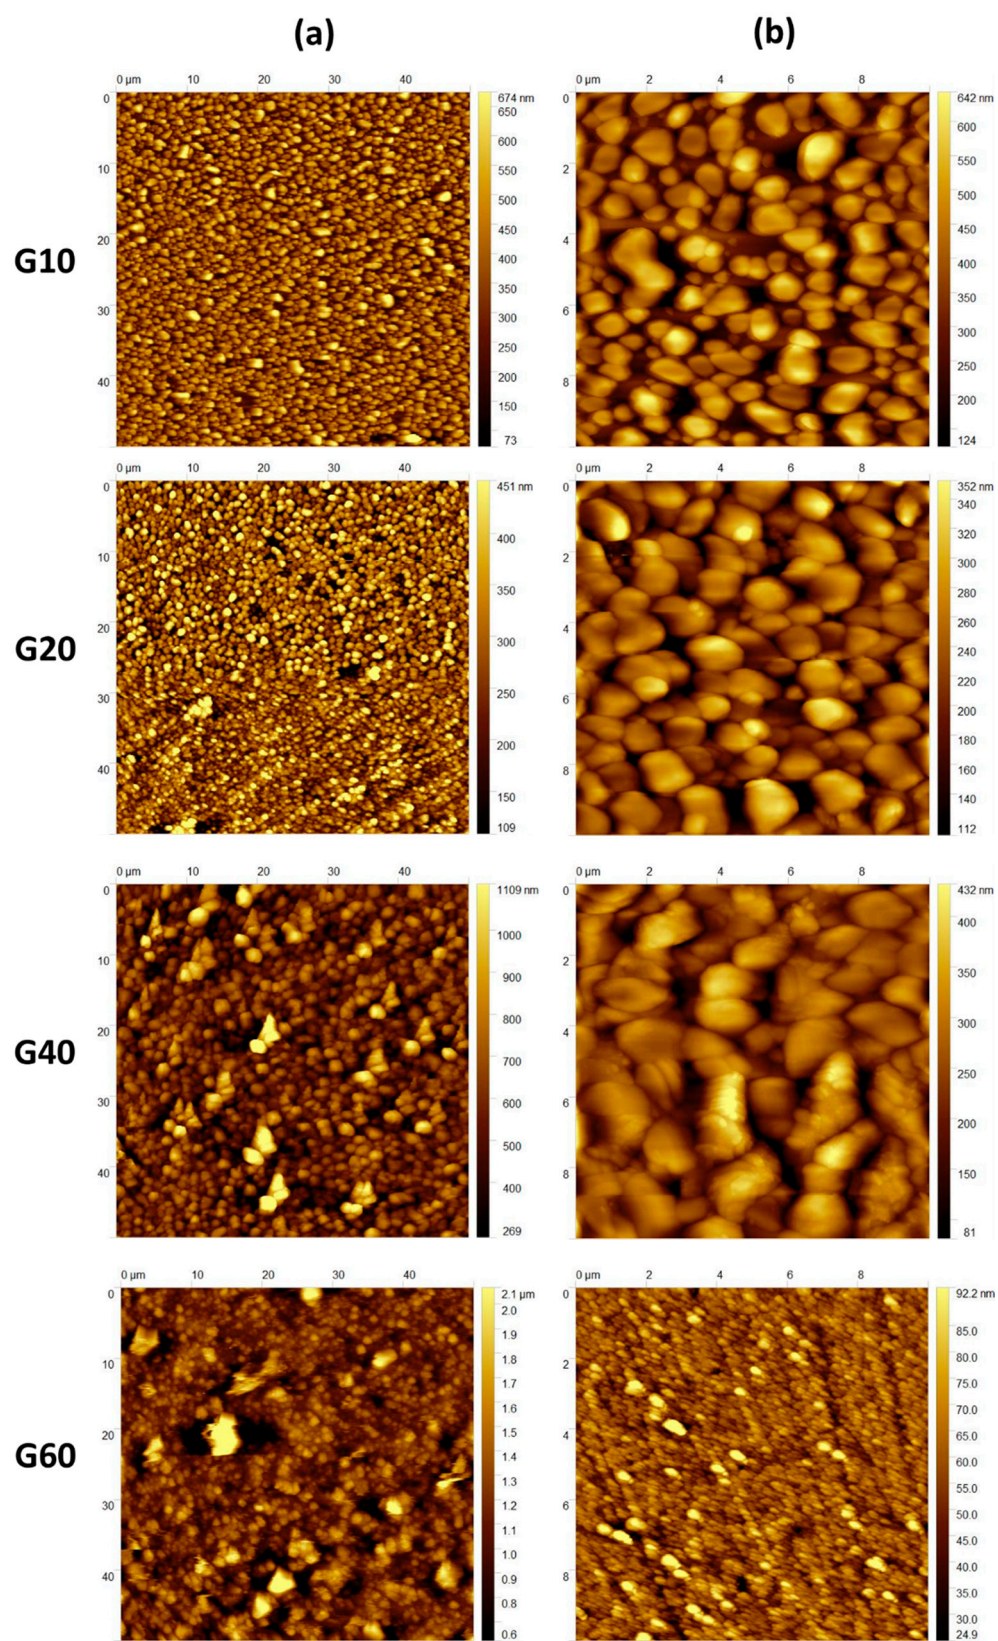

**Figure S3.** AFM topography images of samples G10 to G60 in GC substrate at 50 μm x 50 μm (a) and 10 μm x 10 μm (b) resolution.

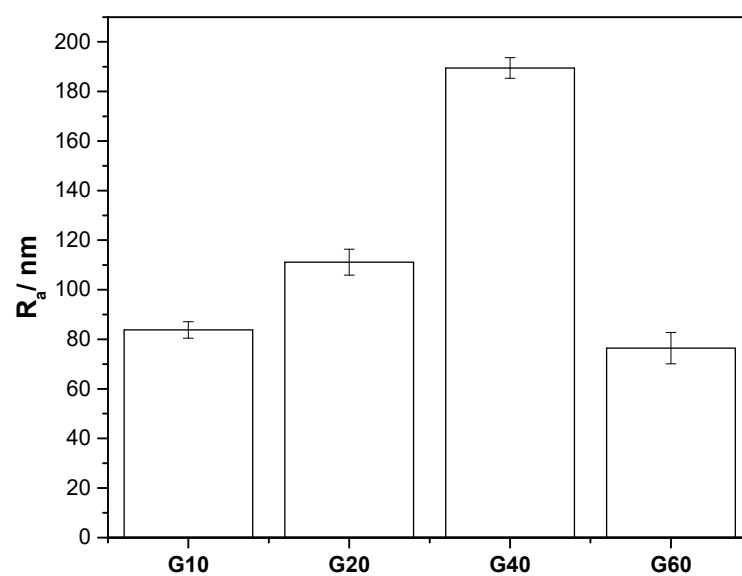

**Figure S4.** Surface roughness ( $R_a$ ) obtained from the AFM images for Samples G10 to G60, at  $50 \mu\text{m} \times 50 \mu\text{m}$  resolution.

## Raman Analysis

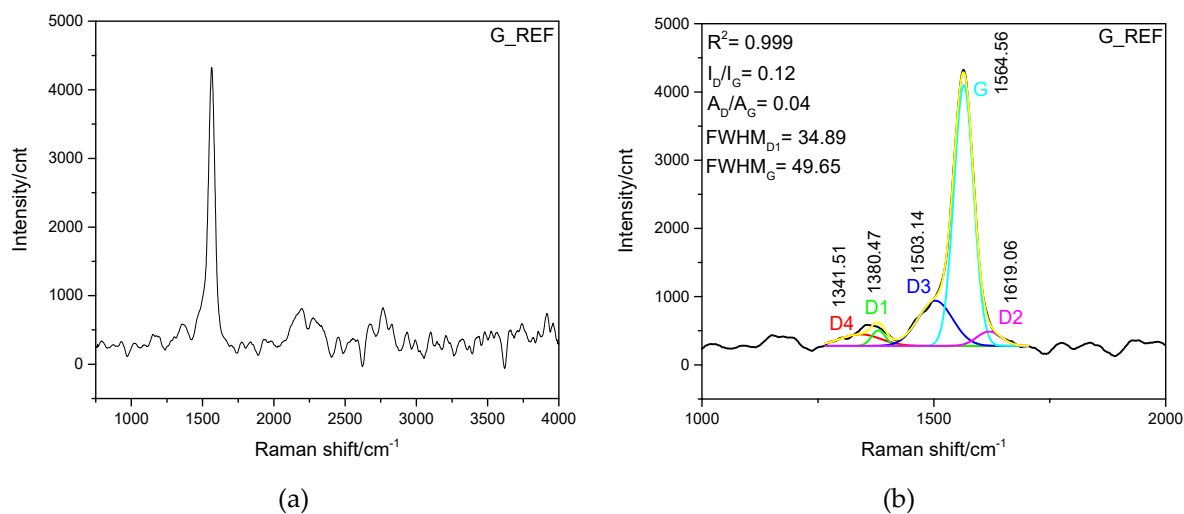

**Figure S5.** Raman spectra of G\_REF (a) and the deconvolution of the peaks from the 1st order Raman region of the signal emitted by G\_REF (b). The sum of the deconvolution is marked with yellow line.

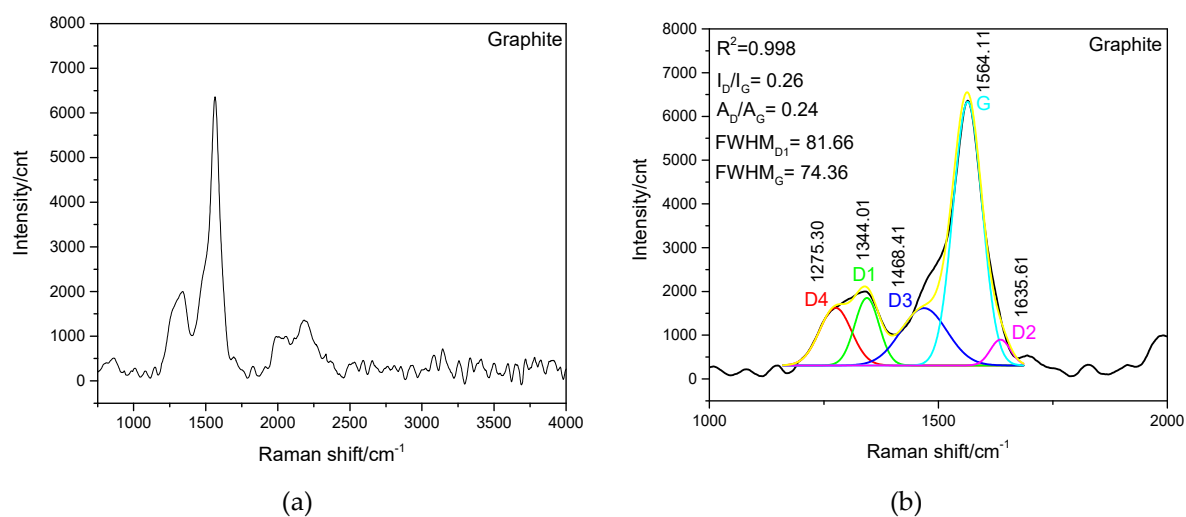

**Figure S6.** Raman spectra of graphite (a) and the deconvolution of the peaks from the 1st order Raman region of the signal emitted by graphite (b). The sum of the deconvolution is marked with yellow line.

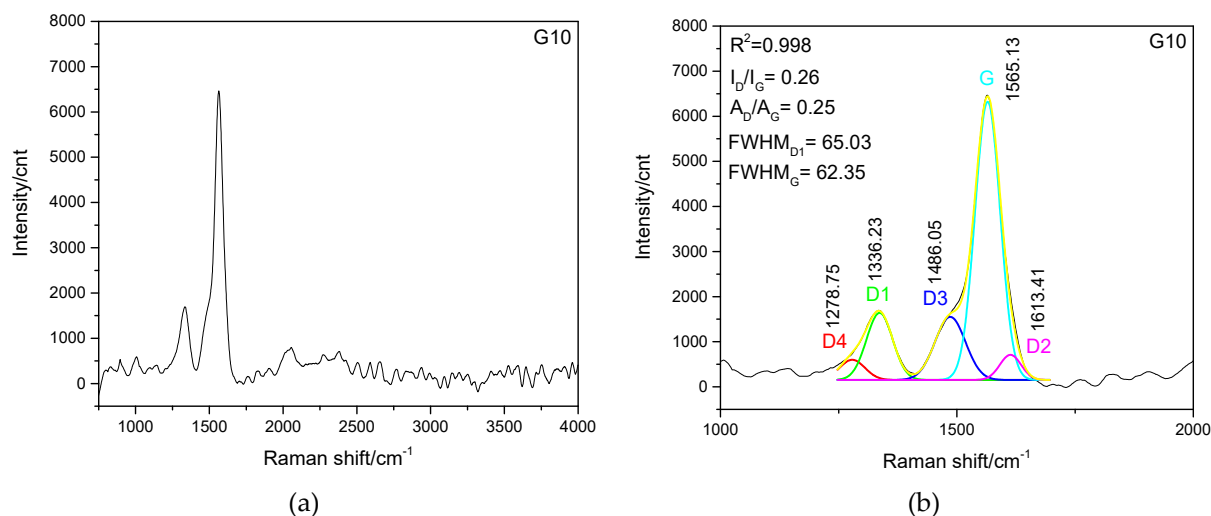

**Figure S7.** Raman spectra of G10 sample (a) and the deconvolution of the peaks from the 1st order Raman region of the signal emitted by G10 sample (b). The sum of the deconvolution is marked with yellow line.

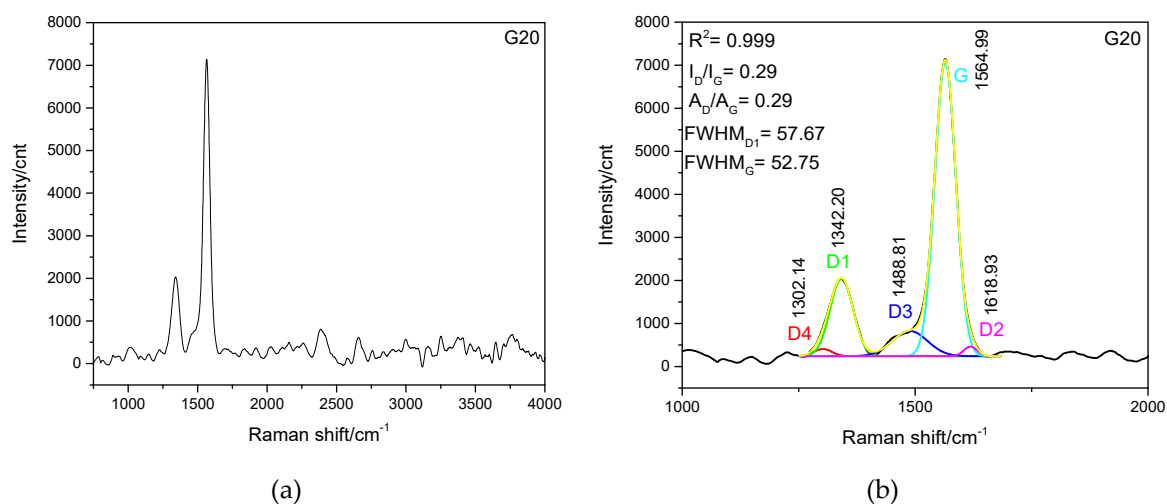

**Figure S8.** Raman spectra of G20 sample (a) and the deconvolution of the peaks from the 1st order Raman region of the signal emitted by G20 sample (b). The sum of the deconvolution is marked with yellow line.



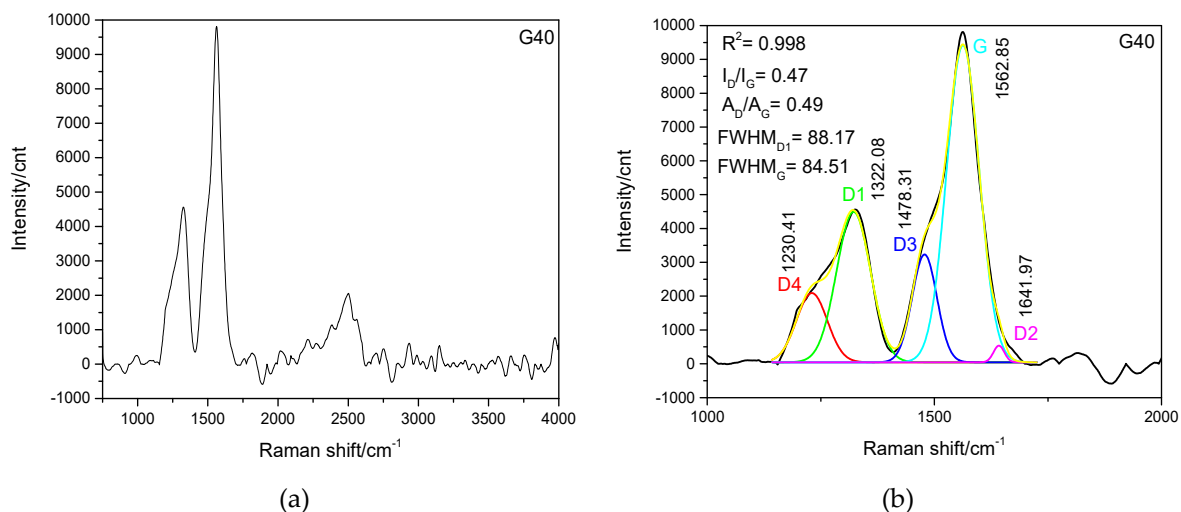

**Figure S9.** Raman spectra of G40 sample (a) and the deconvolution of the peaks from the 1st order Raman region of the signal emitted by G40 sample (b). The sum of the deconvolution is marked with yellow line.

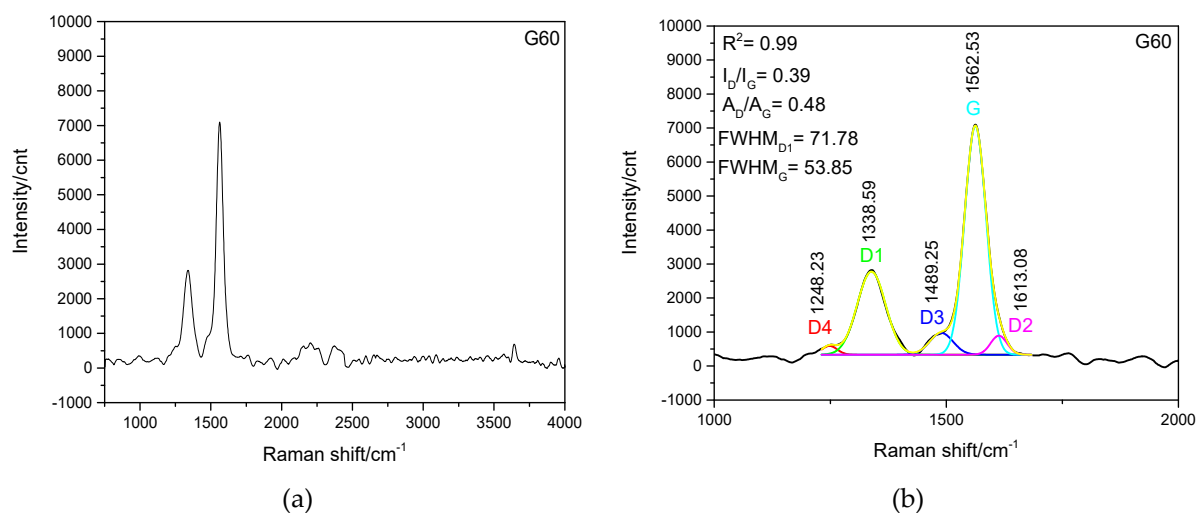

**Figure S10.** Raman spectra of G60 sample (a) and the deconvolution of the peaks from the 1st order Raman region of the signal emitted by G60 sample (b). The sum of the deconvolution is marked with yellow line.



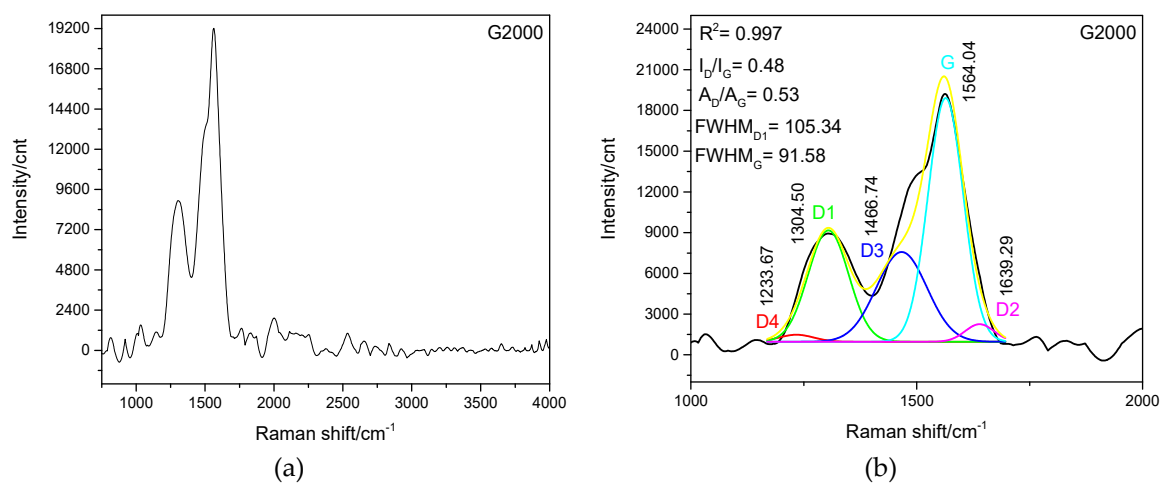

**Figure S11.** Raman spectra of G@2000 sample (a) and the deconvolution of the peaks from the 1st order Raman region of the signal emitted by G@2000 sample (b). The sum of the deconvolution is marked with yellow line.

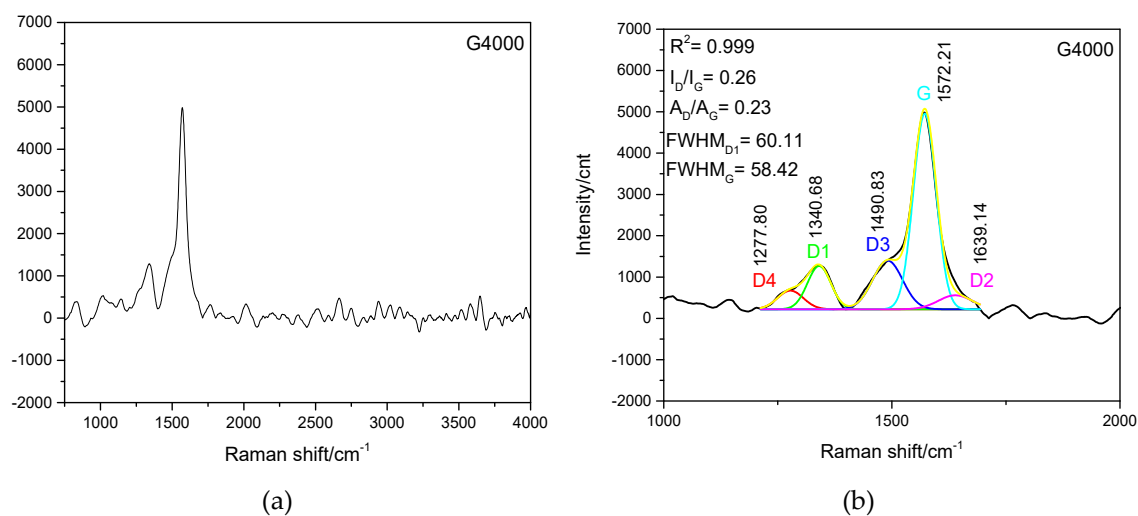

**Figure S12.** Raman spectra of G@4000 sample (a) and the deconvolution of the peaks from the 1st order Raman region of the signal emitted by G@4000 sample (b). The sum of the deconvolution is marked with yellow line.

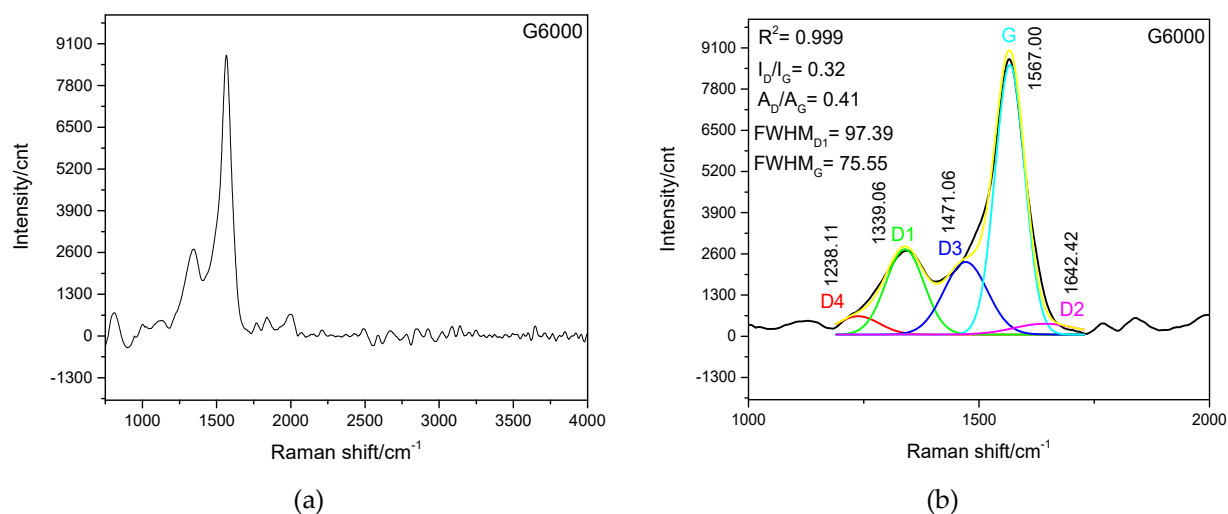

**Figure S13.** Raman spectra of G@6000 sample (a) and the deconvolution of the peaks from the 1st order Raman region of the signal emitted by G@6000 sample (b). The sum of the deconvolution is marked with yellow line.

**Table S1.** Raman data related to the G and D bands locations and ID/IG ratio for all the studied carbon materials.

|                 | G band/ $\text{cm}^{-1}$ | D band/ $\text{cm}^{-1}$ | $I_D/I_G$ |
|-----------------|--------------------------|--------------------------|-----------|
| <b>G_REF</b>    | $1564.56 \pm 0.18$       | $1380.47 \pm 0.81$       | 0.15      |
| <b>Graphite</b> | $1564.10 \pm 0.10$       | $1344.00 \pm 3.63$       | 0.26      |
| <b>G10</b>      | $1565.13 \pm 0.73$       | $1336.67 \pm 2.41$       | 0.26      |
| <b>G20</b>      | $1565.00 \pm 0.06$       | $1342.20 \pm 1.13$       | 0.29      |
| <b>G40</b>      | $1562.85 \pm 0.29$       | $1322.08 \pm 0.79$       | 0.48      |
| <b>G60</b>      | $1562.54 \pm 0.09$       | $1338.59 \pm 0.11$       | 0.39      |
| <b>G@2000</b>   | $1564.06 \pm 3.76$       | $1304.50 \pm 4.51$       | 0.48      |
| <b>G@4000</b>   | $1572.21 \pm 0.42$       | $1340.69 \pm 2.17$       | 0.26      |
| <b>G@6000</b>   | $1567.00 \pm 0.71$       | $1339.06 \pm 3.33$       | 0.32      |

### Electrochemical studies: IKA ULTRA-TURRAX® Tube Drive equipment

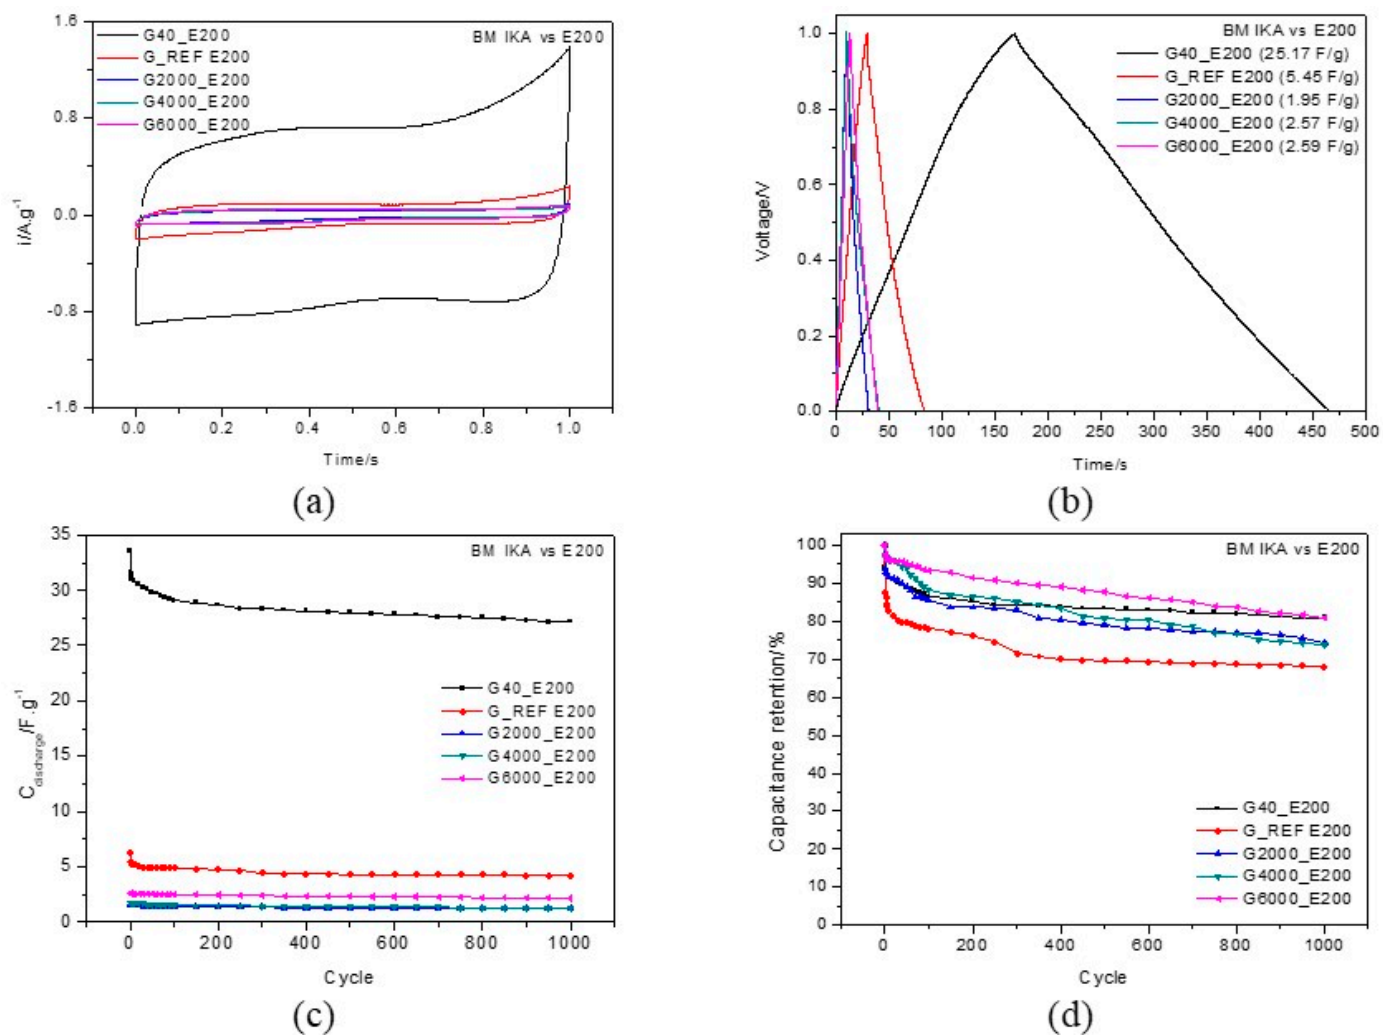

**Figure S14.** Ball milling effect using IKA ULTRA-TURRAX® Tube Drive for G\_REF, G@2000, G@4000 and G@6000 at 30 °C, with comparison with G40 sample. (a) cyclic voltammetry; (b) galvanostatic charge-discharge curves recorded with current density  $1A.g^{-1}$ ; (c) discharge gravimetric capacitance for 1000 cycles; (d) capacitance retention.

### Temperature effect on capacitance

**Table S2.** Temperature effect on capacitance for the different ball-milled carbon materials.

|      |          | 1st Cycle         |       |       |       | 1000th Cycle      |       |       |       |
|------|----------|-------------------|-------|-------|-------|-------------------|-------|-------|-------|
|      |          | 30°C              | 40°C  | 50°C  | 60°C  | 30°C              | 40°C  | 50°C  | 60°C  |
|      |          | Capacitance (F/g) |       |       |       | Capacitance (F/g) |       |       |       |
| E200 | G_REF    | 5.45              | 6.85  | 6.96  | 9.11  | 4.35              | 4.53  | 5.16  | 5.9   |
|      | Graphite | 4.27              | 4.33  | 4.51  | 5.09  | 1.71              | 1.82  | 2.03  | 2.27  |
|      | G10      | 2.36              | 2.88  | 3.43  | 4.09  | 2.11              | 2.61  | 3.1   | 3.8   |
|      | G20      | 24.83             | 25.33 | 25.98 | 26.74 | 19.8              | 22.31 | 23.58 | 25.01 |
|      | G40      | 25.1              | 25.89 | 26.47 | 27.88 | 23.1              | 24.87 | 25.41 | 26.09 |
|      | G60      | 4.19              | 5.01  | 5.54  | 5.96  | 3.99              | 4.31  | 4.92  | 5.33  |
|      | G@2000   | 1.95              | 2.8   | 3.89  | 5.01  | 1.28              | 2.41  | 3.07  | 4.38  |
|      | G@4000   | 2.57              | 3.77  | 4.61  | 5.33  | 1.39              | 3.09  | 4.03  | 4.87  |
|      | G@6000   | 2.59              | 3.91  | 4.84  | 5.55  | 2.35              | 3.64  | 4.31  | 4.97  |

### Extra studies: IKA ULTRA-TURRAX® Tube Drive equipment

Several experiments were performed with the ULTRA-TURRAX, changing the time and the rotation rate as can be verified in the figure and table below. 1 h of treatment gave the better results, although only residual changes in the specific capacitance can be observed. For times longer than 1 h, ULTRA-TURRAX plastic vessels revealed signs of strong material wear and in some cases even the rupture of the vessel was observed. The capacitance retention after 1000 charge-discharge cycles is of 83.4% for all these conditions.

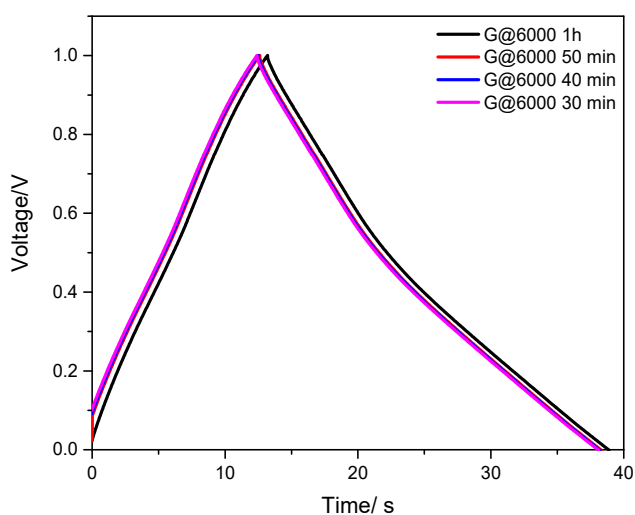

(a)

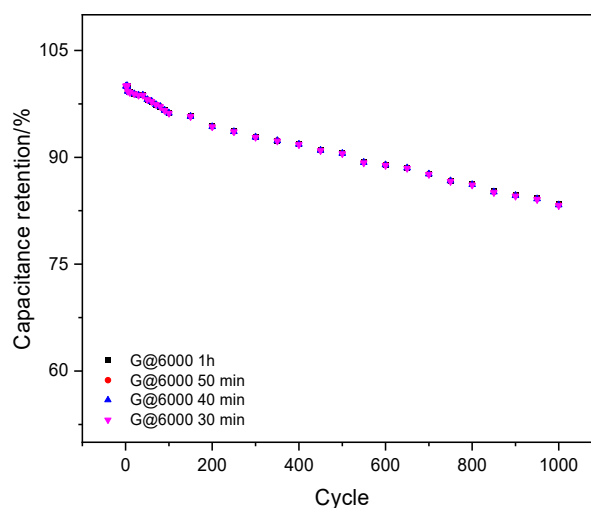

(b)

**Figure S15.** Ball milling time effect using IKA ULTRA-TURRAX® Tube Drive for G\_REF G@6000 at 30 °C. (a) galvanostatic charge-discharge curves recorded with current density 1A.g<sup>-1</sup>; (b) capacitance retention for 1000 cycles.

**Table S3.** specific capacitance determined for IKA ULTRA-TURRAX® Tube Drive G@6000 with different milling time (30, 40, 50 and 60 minutes).

| Samples         | Specific Capacitance (F. g <sup>-1</sup> ) |
|-----------------|--------------------------------------------|
| G@6000 _ 1h     | 2.59 ±0.31                                 |
| G@6000 _ 50 min | 2.58 ±0.28                                 |
| G@6000 _ 40 min | 2.58 ±0.17                                 |
| G@6000 _ 30 min | 2.57 ±0.33                                 |
